# Supplementary material
Source: publisher figshare collection journal article supplement (https://sage.figshare.com/ndownloader/files/24172153)
Supplement: Supplementary file 1 [file 24172153]

## Sheet: Partners of 3, 4, 5 GAGs
		Glycosaminoglycan-protein interactions: the first draft of the glycosaminoglycan interactome
		Sylvain D. Vallet, Olivier Clerc and Sylvie Ricard-Blum*
				Univ Lyon, University Claude Bernard Lyon 1, CNRS, INSA Lyon, CPE, Institute of Molecular and Supramolecular Chemistry and Biochemistry, UMR 5246, F-69622 Villeurbanne cedex, France.
SUPPLEMENTARY TABLE S2
List of proteins binding to three, four or five glycosaminoglycans
Protein (gene name(s))	GAG partner
	Chondroitin sulfate	Dermatan sulfate	Heparin/Heparan sulfate	Hyaluronan	Keratan sulfate
IGFBP7	¢	¢	¢	¢	¢
PCOLCE	¢	¢	¢	¢
CTSK	¢	¢	¢		¢
TNFAIP6	¢	¢	¢	¢
APP PFRAG1 (PRO_0000000092)*	¢	¢	¢	¢
LOX PFRAG (PRO_0000018520)*	¢	¢	¢	¢
APOE	¢	¢	¢
COL18A1 PFRAG1 (PRO_0000005794)*	¢	¢	¢
COL1A1,COL1A1,COL1A2 CPX	¢	¢	¢
COL4A1,COL4A1,COL4A2 CPX	¢	¢	¢
COL6A1,COL6A2,COL6A3 CPX	¢	¢	¢
DCC	¢		¢		¢
EFNA1	¢		¢		¢
EFNA3	¢		¢		¢
SOD1	¢	¢	¢
TGM2	¢	¢	¢
THBS1	¢	¢	¢
* PRO feature is indicated for each protein fragment
